# Supplementary material for: Global Burden Related to Nitrous Oxide Exposure in Medical and Recreational Settings: A Systematic Review and Individual Patient Data Meta-Analysis
Source: PubMed Central journal article supplement (PMC6518054; doi:10.3390/jcm8040551), 2019-04-23
Supplement: jcm-08-00551-s001.pdf [file jcm-08-00551-s001.pdf]

1 **Table S1.** Detail of the Twenty-Nine Studies Excluded from the Systematic Review

| First author, year                        | Reason of exclusion from the systematic review | Reference |
|-------------------------------------------|------------------------------------------------|-----------|
| Adornato BT. 1978                         | Review paper                                   | [1]       |
| Burman JF, Amess JA, et al. 1978          | Review paper                                   | [2]       |
| Nunn JF, Chanarin I. 1978                 | Review paper                                   | [3]       |
| Chanarin I. 1979                          | Review paper                                   | [4]       |
| Chanarin I. 1980                          | Review paper                                   | [5]       |
| Nevins MA. 1980                           | No biological data available                   | [6]       |
| Gillman MA. 1982                          | Review paper                                   | [7]       |
| Lunsford JM, Wynn MH. 1983                | Congress abstract                              | [8]       |
| Koblin DD, Biebuyck JF. 1986              | Narrative review                               | [9]       |
| Ueland PM. 1987                           | Not in English                                 | [10]      |
| Ruprecht J, Erdmann W, et al. 1989        | Not in English                                 | [11]      |
| Ostreicher DS. 1994                       | Review paper                                   | [12]      |
| Hoerauf K, Koller C, et al. 1995          | Not in English                                 | [13]      |
| King M, Coulter C, et al. 1995            | No available data                              | [14]      |
| Jongen JC, Koehler PJ, et al. 1995        | Not in English                                 | [15]      |
| Nestor PJ, Stark RJ. 1996                 | No biological data available                   | [16]      |
| Takacs J. 1996                            | Not in English                                 | [17]      |
| Lai NY, Silbert PL. 1997                  | Congress abstract                              | [18]      |
| Mayall M. 1999                            | Review paper                                   | [19]      |
| Alarcia R, Ara JR, et al. 1999            | Not in English                                 | [20]      |
| Gothe CJ, Petersson G. 1999               | Not in English                                 | [21]      |
| Lindstedt G. 1999                         | Not in English                                 | [22]      |
| Barbosa L, Leal I, et al. 2000            | Not in English                                 | [23]      |
| Vinciguerra C, Chazerain P, et al. 2000   | Not in English                                 | [24]      |
| Smith I. 2001                             | Review paper                                   | [25]      |
| Deleu D, Hanssens Y, et al. 2001          | Review paper                                   | [26]      |
| England JM, Linnell JC. 2001              | Review paper                                   | [27]      |
| Van Geffen GJ, de Boer HD, et al. 2001    | Not in English                                 | [28]      |
| Burman JF. 2003                           | Editorial                                      | [29]      |
| Erbe RW, Salis RJ. 2003                   | Narrative review                               | [30]      |
| Yamada T, Hamada H. 2005                  | Subject not exposed to N <sub>2</sub> O        | [31]      |
| Gerges FJ, Dalal AR. 2006                 | Previously treated with vitamin B12            | [32]      |
| Cohen Aubart F, Sedel F et al. 2007       | Not in English                                 | [33]      |
| El Otmani H, El Moutawakil B, et al. 2007 | Not in English                                 | [34]      |
| Luzardo GE, Karlinski RA, et al. 2008     | Review paper                                   | [35]      |
| El Otmani H, El Moutawakil B, et al. 2009 | Not in English                                 | [36]      |
| Paul I, Reichard RR. 2009                 | Subject not exposed to N <sub>2</sub> O        | [37]      |

|                                               |                                     |      |
|-----------------------------------------------|-------------------------------------|------|
| <b>Asghar A, Ali FM. 2012</b>                 | Previously treated with vitamin B12 | [38] |
| <b>Chaugny C, Simon J, et al. 2014</b>        | Not in English                      | [39] |
| <b>Chin J, Forzani B, et al. 2015</b>         | Review paper                        | [40] |
| <b>Liakoni E, Liechti ME. 2015</b>            | Not in English                      | [41] |
| <b>Goodman BP. 2015</b>                       | Review paper                        | [42] |
| <b>van Amsterdam J, Nabben T, et al. 2015</b> | Review paper                        | [43] |
| <b>Garakani A, Jaffe RJ, et al. 2016</b>      | Review paper                        | [44] |
| <b>Ingelmo P, Wei A, et al. 2017</b>          | Previously treated with vitamin B12 | [45] |
| <b>Fluegge K. 2017</b>                        | Review paper                        | [46] |
| <b>Stockton L, Simonsen C, et al. 2017</b>    | Review paper                        | [47] |

---

3 **Table S2.** Detail of the Studies Retained in the Systematic Review

| <b>First author, year</b> | <b>Reference</b> |
|---------------------------|------------------|
| Layzer, 1978              | [48]             |
| Layzer, 1978              | [49]             |
| Sahenk, 1978              | [50]             |
| Gutmann                   | [51]             |
| Paulson, 1979             | [52]             |
| Nunn, 1982                | [53]             |
| Blanco, 1983              | [54]             |
| Murdoch, 1985             | [55]             |
| Heyer, 1986               | [56]             |
| Schilling, 1986           | [57]             |
| Berger, 1988              | [58]             |
| Stabler, 1991             | [59]             |
| Vishnubhakat, 1991        | [60]             |
| Stacy, 1992               | [61]             |
| Hadzic, 1995              | [62]             |
| Kinsella, 1995            | [63]             |
| McMorrow, 1995            | [64]             |
| Rosener, 1996             | [65]             |
| Brett, 1997               | [66]             |
| Beltramello, 1998         | [67]             |
| Pema, 1998                | [68]             |
| Jameson, 1999             | [69]             |
| Lee, 1999                 | [70]             |
| Ogundipe, 1999            | [71]             |
| Butzkueven, 2000          | [72]             |
| Sesso, 1999               | [73]             |
| Felmet, 2000              | [74]             |
| Marie, 2000               | [75]             |
| McNeely, 2000             | [76]             |
| Iwata, 2001               | [77]             |
| Ilniczky, 2002            | [78]             |
| Ng, 2002                  | [79]             |
| Selzer, 2003              | [80]             |
| Waclawik, 2003            | [81]             |
| Diamond, 2004             | [82]             |
| Doran, 2004               | [83]             |
| Miller, 2004              | [84]             |
| Ahn, 2005                 | [85]             |

|                  |       |
|------------------|-------|
| Waters, 2005     | [86]  |
| Sethi, 2006      | [87]  |
| Cartner, 2007    | [88]  |
| Levine, 2007     | [89]  |
| Shulman, 2007    | [90]  |
| Wu, 2007         | [91]  |
| Meyers, 2008     | [92]  |
| Singer, 2008     | [93]  |
| Huang, 2009      | [94]  |
| Renard, 2009     | [95]  |
| Wijesekera, 2009 | [96]  |
| Richardson, 2010 | [97]  |
| Tatum, 2010      | [98]  |
| Alt, 2011        | [99]  |
| Hathout, 2011    | [100] |
| Lin, 2011        | [101] |
| Probasco, 2011   | [102] |
| Ghobrial, 2012   | [103] |
| Hsu, 2012        | [104] |
| Sotirchos, 2012  | [105] |
| Cheng, 2013      | [106] |
| Chiang, 2013     | [107] |
| Gursoy, 2013     | [108] |
| Safari, 2013     | [109] |
| Arshi, 2014      | [110] |
| Dababneh, 2014   | [111] |
| Garakani, 2014   | [112] |
| Hu, 2014         | [113] |
| Rheinboldt, 2014 | [114] |
| Shwe, 2014       | [115] |
| Duque, 2015      | [116] |
| Morris, 2015     | [117] |
| Pugliese, 2015   | [118] |
| Thompson, 2015   | [119] |
| Wolpert, 2015    | [120] |
| Chen, 2016       | [121] |
| Hirvioja, 2016   | [122] |
| Massey, 2016     | [123] |
| Sleeman, 2016    | [124] |
| Buizert, 2017    | [125] |
| Kaski, 2017      | [126] |
| Yuan, 2017       | [127] |

|                        |       |
|------------------------|-------|
| <b>Chen, 2018</b>      | [128] |
| <b>Egan, 2018</b>      | [129] |
| <b>Johnson, 2018</b>   | [130] |
| <b>Keddie, 2018</b>    | [131] |
| <b>Middleton, 2018</b> | [132] |

---

4  
5

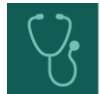

6 **Table S3.** Variables Associated with Regular Nitrous Oxide Exposure in Univariate Analyses

|                              | Short exposure to N <sub>2</sub> O |            |            | Regular exposure to N <sub>2</sub> O |            |            | <i>p</i> -value* |
|------------------------------|------------------------------------|------------|------------|--------------------------------------|------------|------------|------------------|
|                              | N                                  | Median     | 25–75 P    | N                                    | Median     | 25–75 P    |                  |
| <b>Age (years)</b>           | 24                                 | 47         | 25–58      | 76                                   | 26         | 22–33      | 0.002            |
| <b>Laboratory findings</b>   |                                    |            |            |                                      |            |            |                  |
| Vitamin B12 (pmol/L)         | 21                                 | 74         | 33–104     | 61                                   | 110        | 81–194     | 0.0008           |
| Folate (serum) (µg/L)        | 9                                  | 13.2       | 7.0–16.1   | 11                                   | 12.7       | 7.3–14.0   | 0.68             |
| Hematocrit (%)               | 5                                  | 34.0       | 26.8–38.5  | 16                                   | 39.3       | 34.6–44.2  | 0.23             |
| Hemoglobin (g/dL)            | 11                                 | 11.2       | 9.5–12.3   | 32                                   | 12.2       | 8.9–13.8   | 0.44             |
| Homocysteine (µmol/L)        | 5                                  | 111.0      | 76.4–142.8 | 26                                   | 46.7       | 28.2–106.0 | 0.06             |
| Mean corpuscular volume (fL) | 15                                 | 104        | 101–110    | 40                                   | 97         | 92–101     | 0.0002           |
| Methylmalonic acid (µmol/L)  | 0                                  | —          | —          | 16                                   | 5.0        | 1.1–6.6    | —                |
| <b>Clinical findings</b>     |                                    |            |            |                                      |            |            |                  |
|                              | N                                  | Percentage | 95% CI     | N                                    | Percentage | 95% CI     | <i>p</i> -value† |
| Abdominal pain               | 24                                 | 0.0        | —          | 76                                   | 4.0        | 0–8.4      | 0.99             |
| Agitation                    | 24                                 | 4.2        | 0–12.8     | 76                                   | 1.3        | 0–3.9      | 0.42             |
| Anorexia                     | 24                                 | 4.2        | 0–12.8     | 76                                   | 0.0        | —          | 0.24             |
| Apnea                        | 24                                 | 4.2        | 0–12.8     | 76                                   | 0.0        | —          | 0.24             |
| Ataxia                       | 24                                 | 8.3        | 0–20.3     | 76                                   | 13.2       | 5.4–20.9   | 0.73             |
| Athetoid movement            | 24                                 | 4.2        | 0–12.8     | 76                                   | 0.0        | —          | 0.24             |
| Behavior alteration          | 24                                 | 0.0        | —          | 76                                   | 7.9        | 1.7–14.1   | 0.33             |
| Bulbar paralysis             | 24                                 | 0.0        | —          | 76                                   | 1.3        | 0–3.9      | 0.99             |
| Chest pain                   | 24                                 | 0.0        | —          | 76                                   | 1.3        | 0–3.9      | 0.99             |
| Mental confusion             | 24                                 | 4.2        | 0–12.8     | 76                                   | 2.6        | 0–6.3      | 0.56             |
| Constipation                 | 24                                 | 0.0        | —          | 76                                   | 4.0        | 0–8.4      | 0.99             |

|                                                       |    |      |           |    |      |           |      |
|-------------------------------------------------------|----|------|-----------|----|------|-----------|------|
| <b>Decreased libido</b>                               | 24 | 0.0  | —         | 76 | 2.6  | 0–6.3     | 0.99 |
| <b>Depression</b>                                     | 24 | 4.2  | 0–12.8    | 76 | 4.0  | 0–8.4     | 0.99 |
| <b>Disorientation</b>                                 | 24 | 4.2  | 0–12.8    | 76 | 0.0  | —         | 0.24 |
| <b>Iterative fallings or equilibrium disorders</b>    | 24 | 12.5 | 0–26.8    | 76 | 27.6 | 17.3–37.9 | 0.17 |
| <b>Fecal incontinence</b>                             | 24 | 4.2  | 0–12.8    | 76 | 1.3  | 0–3.9     | 0.42 |
| <b>Foot pain</b>                                      | 24 | 0.0  | —         | 76 | 4.0  | 0–8.4     | 0.99 |
| <b>Cognitive decline</b>                              | 24 | 12.5 | 0–26.8    | 76 | 7.9  | 1.7–14.1  | 0.44 |
| <b>Headache</b>                                       | 24 | 4.2  | 0–12.8    | 76 | 4.0  | 0–8.4     | 0.99 |
| <b>Hyperpigmentation</b>                              | 24 | 0.0  | —         | 76 | 4.0  | 0–8.4     | 0.99 |
| <b>Hypotonia</b>                                      | 24 | 4.2  | 0–12.8    | 76 | 0.0  | —         | 0.24 |
| <b>Impaired memory</b>                                | 24 | 4.2  | 0–12.8    | 76 | 5.3  | 0.1–10.4  | 0.99 |
| <b>Lethargy</b>                                       | 24 | 8.3  | 0–20.3    | 76 | 0.0  | —         | 0.06 |
| <b>Lhermitte’s sign</b>                               | 24 | 8.3  | 0–20.3    | 76 | 17.1 | 8.4–25.8  | 0.51 |
| <b>Neck pain</b>                                      | 24 | 0.0  | —         | 76 | 1.3  | 0–3.9     | 0.99 |
| <b>Painful erection</b>                               | 24 | 0.0  | —         | 76 | 1.3  | 0–3.9     | 0.99 |
| <b>Paranoid behavior</b>                              | 24 | 0.0  | —         | 76 | 4.0  | 0–8.4     | 0.99 |
| <b>Paraplegia</b>                                     | 24 | 4.2  | 0–12.8    | 76 | 0.0  | —         | 0.24 |
| <b>Paresthesia in extremities, numbness, tingling</b> | 24 | 70.8 | 51.2–90.4 | 76 | 82.9 | 74.2–91.6 | 0.24 |
| <b>Polyneuropathy</b>                                 | 24 | 0.0  | —         | 76 | 1.3  | 0–3.9     | 0.99 |
| <b>Quadriparesis or paralysis</b>                     | 24 | 8.3  | 0–20.3    | 76 | 6.6  | 0.9–12.3  | 0.67 |
| <b>Respiratory paralysis</b>                          | 24 | 0.0  | —         | 76 | 1.3  | 0–3.9     | 0.99 |
| <b>Seizures</b>                                       | 24 | 8.3  | 0–20.3    | 76 | 0.0  | —         | 0.06 |
| <b>Spasm</b>                                          | 24 | 0.0  | —         | 76 | 1.3  | 0–3.9     | 0.99 |
| <b>Suicidal thought</b>                               | 24 | 0.0  | —         | 76 | 1.3  | 0–3.9     | 0.99 |
| <b>Syncope</b>                                        | 24 | 0.0  | —         | 76 | 1.3  | 0–3.9     | 0.99 |

|                                                                          |    |      |           |    |      |           |      |
|--------------------------------------------------------------------------|----|------|-----------|----|------|-----------|------|
| <b>Tachypnea</b>                                                         | 24 | 4.2  | 0–12.8    | 76 | 0.0  | —         | 0.24 |
| <b>Unsteady gait, walking difficulty</b>                                 | 24 | 54.2 | 32.7–75.7 | 76 | 59.2 | 47.9–70.5 | 0.81 |
| <b>Urinary incontinence</b>                                              | 24 | 12.5 | 0–26.8    | 76 | 6.6  | 0.9–12.3  | 0.39 |
| <b>Urine retention</b>                                                   | 24 | 4.2  | 0–12.8    | 76 | 5.3  | 0.1–10.4  | 0.99 |
| <b>Vertigo</b>                                                           | 24 | 0.0  | —         | 76 | 1.3  | 0–3.9     | 0.99 |
| <b>Visual hallucination</b>                                              | 24 | 4.2  | 0–12.8    | 76 | 1.3  | 0–3.9     | 0.42 |
| <b>Vomiting</b>                                                          | 24 | 0.0  | —         | 76 | 1.3  | 0–3.9     | 0.99 |
| <b>Weakness</b>                                                          | 24 | 25.0 | 6.3–43.7  | 76 | 48.7 | 37.2–60.2 | 0.06 |
| <b>Reported diagnoses</b>                                                |    |      |           |    |      |           |      |
| <b>Axonal polyneuropathy</b>                                             | 24 | 12.5 | 0–26.8    | 76 | 10.5 | 3.5–17.6  | 0.72 |
| <b>Vitamin B12 deficiency</b>                                            | 24 | 25.0 | 6.3–43.7  | 76 | 10.5 | 3.5–17.6  | 0.09 |
| <b>Encephalopathy</b>                                                    | 24 | 4.2  | 0–12.8    | 76 | 1.3  | 0–3.9     | 0.42 |
| <b>Generalized demyelinating polyneuropathy</b>                          | 24 | 20.8 | 3.3–38.4  | 76 | 23.7 | 13.9–33.5 | 0.99 |
| <b>MTHFR deficiency</b>                                                  | 24 | 4.2  | 0–12.8    | 76 | 0.0  | —         | 0.24 |
| <b>Myelopathy</b>                                                        | 24 | 16.7 | 0.6–32.7  | 76 | 28.9 | 18.5–39.4 | 0.29 |
| <b>Recurrent paraparesis</b>                                             | 24 | 0.0  | —         | 76 | 1.3  | 0–3.9     | 0.99 |
| <b>Subacute combined degeneration</b>                                    | 24 | 37.5 | 16.6–58.4 | 76 | 25.0 | 15–35     | 0.29 |
| <b>Toxicity due to N<sub>2</sub>O with no specific diagnosis applied</b> | 24 | 8.3  | 0–20.3    | 76 | 22.4 | 12.8–32   | 0.15 |
| <b>Male gender</b>                                                       | 24 | 58.3 | 37.1–79.6 | 76 | 60.5 | 49.3–71.8 | 0.99 |
| <b>Presence of T2 signal hyperintensity in the spinal cord</b>           | 16 | 81.3 | 59.8–100  | 59 | 64.4 | 51.8–77   | 0.24 |

7 IQR: interquartile range; N: total number of studied patients.

8 \* Mann-Whitney *U* test

9 † Fisher’s exact test

10

11

12



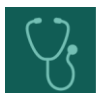

13 **Table S4.** Association Between the Amount of Nitrous Oxide (N<sub>2</sub>O) Exposure and Main Clinical,  
14 Laboratory, and Magnetic Resonance Findings of the N<sub>2</sub>O-Related Disease

| <b>Main clinical findings</b>                           | <b><i>p</i>-value*</b>            |
|---------------------------------------------------------|-----------------------------------|
| Paresthesia in extremities, numbness, tingling          | 0.53                              |
| Unsteady gait, walking difficulty                       | 0.28                              |
| Weakness                                                | 0.55                              |
| Iterative fallings or equilibrium disorders             | 0.15                              |
| Ataxia                                                  | 0.30                              |
| <b>Laboratory findings</b>                              | <b><i>p</i>-value<sup>†</sup></b> |
| Hemoglobin (g/dL)                                       | Low sample size                   |
| Hematocrit (%)                                          | Low sample size                   |
| Mean corpuscular volume (fL)                            | Low sample size                   |
| Vitamin B12 (pmol/L)                                    | 0.08                              |
| Folate (serum) (µg/L)                                   | Low sample size                   |
| Homocysteine (µmol/L)                                   | Low sample size                   |
| Methylmalonic acid (µmol/L)                             | Low sample size                   |
| <b>Main reported diagnoses</b>                          | <b><i>p</i>-value*</b>            |
| Subacute combined degeneration                          | 0.36                              |
| Generalized demyelinating polyneuropathy                | 0.31                              |
| Myelopathy                                              | 0.91                              |
| <b>Magnetic resonance imaging findings</b>              | <b><i>p</i>-value*</b>            |
| Presence of T2 signal hyperintensity in the spinal cord | 0.17                              |

15 \* Mann Whitney *U* test

16 † Spearman's rank correlation coefficient

17

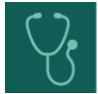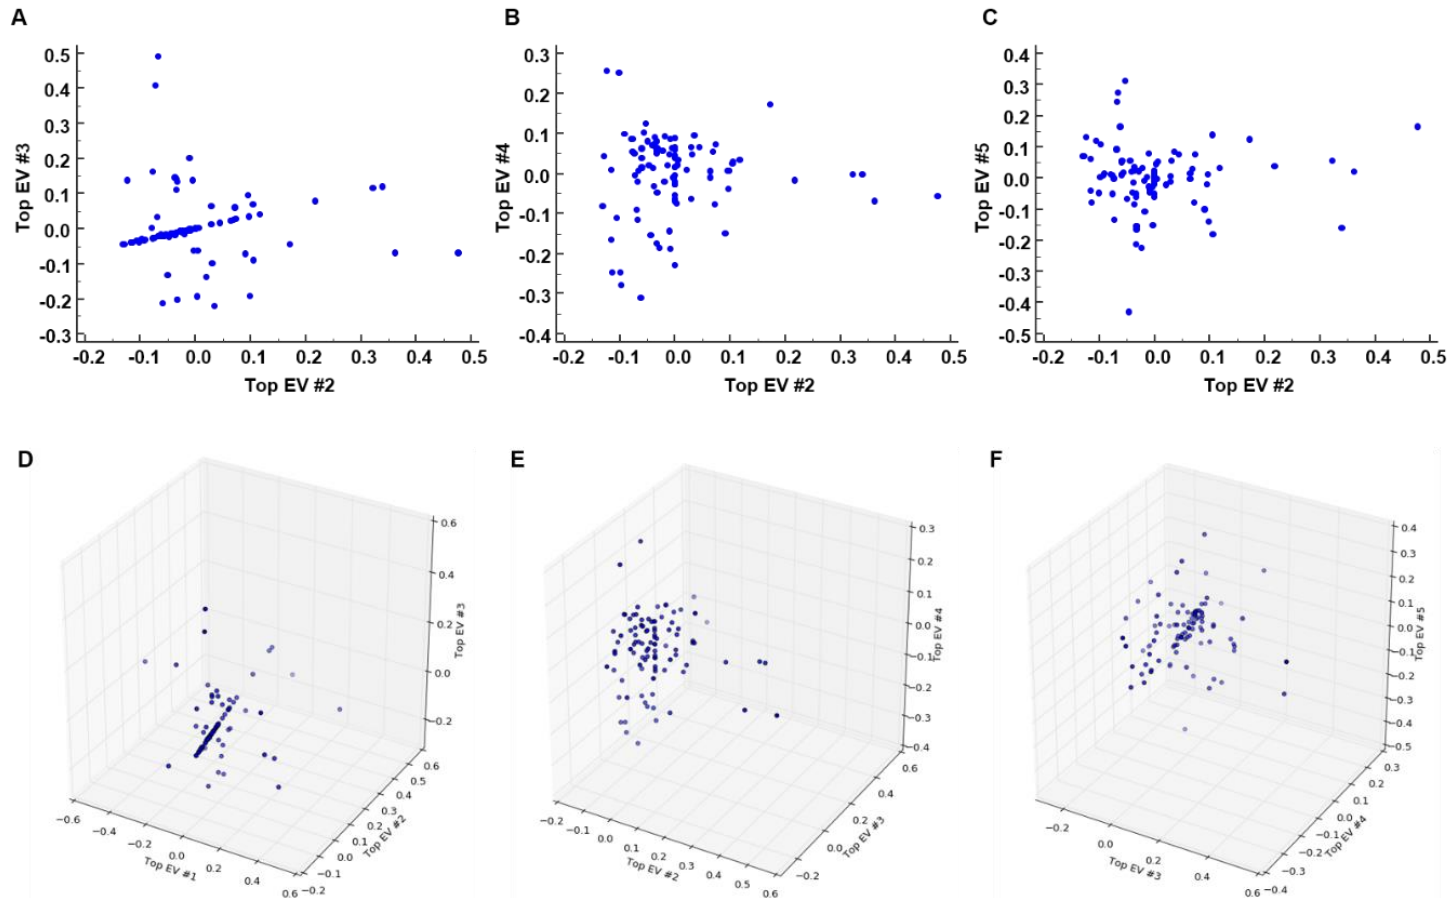

19  
20  
21  
22  
23  
24

**Figure S1.** Assessment of study bias induced by population stratification using principal component analysis. Panels (a) to (c) report the two-dimensional visualization of the whole population according to the principal components of the eigenvalue (EV) #2 vs. EV #3 (a), EV #2 vs. EV #4 (b) and EV #2 vs. EV #5 (c). Panels (d) to (f) report the three-dimensional visualization of the whole population according to the principal components for the EV #1, EV #2, and EV #3 (d), EV #2, EV #3, and EV #4 (e), and EV #3, EV #4, and EV #5 (f).

25  
26

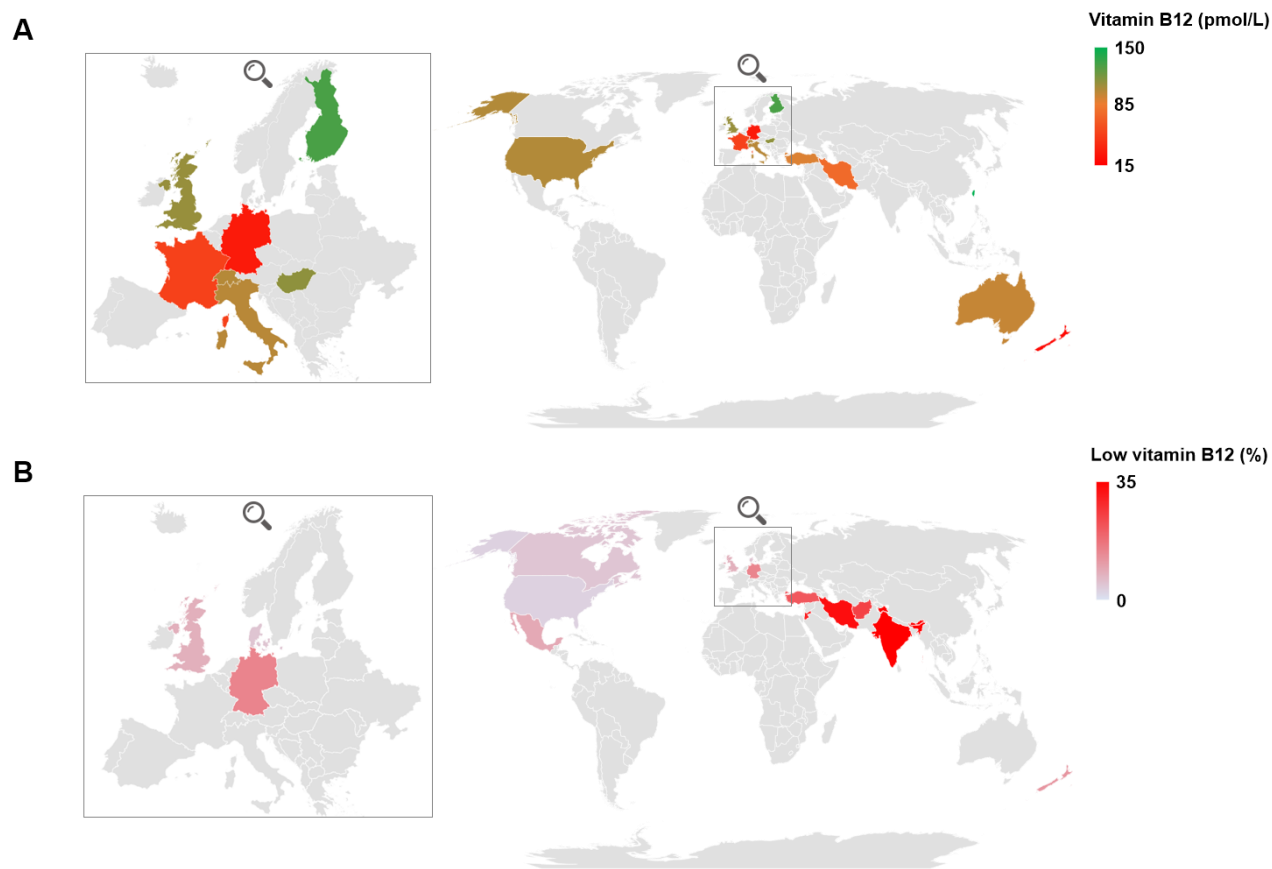

27  
28  
29  
30

**Figure S2.** (a) Worldwide landscape of serum or plasma vitamin B12 concentrations among patients with N<sub>2</sub>O-induced toxicity. (b) Worldwide prevalence of subjects with low serum or plasma vitamin B12 concentrations among apparently healthy individuals. Prevalence data were extracted from different studies reported around the world [133-142] and from a recently published literature review [143].

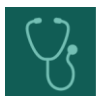

## 31 References

- 32 1. Adornato, B.T. Nitrous oxide and vitamin B12. *Lancet (London, England)* **1978**, *2*, 1318.
- 33 2. Burman, J.F.; Amess, J.A.; Mollin, D.L. Nitrous oxide and vitamin B12. *Lancet (London, England)* **1978**, *2*,
- 34 1153–1154.
- 35 3. Nunn, J.F.; Chanarin, I. Nitrous oxide and vitamin B12. *British journal of anaesthesia* **1978**, *50*, 1089–1090.
- 36 4. Chanarin, I. Nitrous oxide and the cobalamins. *Clinical science (London, England : 1979)* **1980**, *59*, 151–
- 37 154.
- 38 5. Chanarin, I. Cobalamins and nitrous oxide: a review. *Journal of clinical pathology* **1980**, *33*, 909–916.
- 39 6. Nevins, M.A. Neuropathy after nitrous oxide abuse. *Jama* **1980**, *244*, 2264.
- 40 7. Gillman, M.A. Safety of nitrous oxide. *Lancet (London, England)* **1982**, *2*, 1397.
- 41 8. Lunsford, J.M.; Wynn, M.H.; Kwan, W.H. Nitrous oxide-induced myeloneuropathy. *J Foot Surg* **1983**,
- 42 22, 222–225.
- 43 9. Koblin, D.D.; Biebuyck, J.F. Is nitrous oxide a dangerous anesthetic for vitamin B12-deficient subjects?
- 44 *Jama* **1986**, *256*, 716.
- 45 10. Ueland, P.M. [Nitrous oxide--not only for fun. Nitrogen oxide, vitamin B12 and folate metabolism].
- 46 *Tidsskrift for den Norske laegeforening : tidsskrift for praktisk medicin, ny raekke* **1987**, *107*, 2305–2308.
- 47 11. Ruprecht, J.; Erdmann, W.; Dzoljic, M.; van Stolk, M.A. [Nitrous oxide in anesthesia--present status of
- 48 the use of nitrous oxide, risks for patients and personnel and treatment of side effects]. *Anaesthesiologie*
- 49 *und Reanimation* **1989**, *14*, 251–259.
- 50 12. Ostreicher, D.S. Vitamin B12 supplements as protection against nitrous oxide inhalation. *The New York*
- 51 *state dental journal* **1994**, *60*, 47–49.
- 52 13. Hoerauf, K.; Koller, C.; Wiesner, G.; Taeger, K.; Hobbhahn, J. [Nitrous oxide exposure of operating room
- 53 personnel in intubation anesthesia]. *Gesundheitswesen (Bundesverband der Arzte des Offentlichen*
- 54 *Gesundheitsdienstes (Germany))* **1995**, *57*, 92–96.
- 55 14. King, M.; Coulter, C.; Boyle, R.S.; Whitby, R.M. Neurotoxicity from overuse of nitrous oxide. *The Medical*
- 56 *journal of Australia* **1995**, *163*, 50–51.
- 57 15. Jongen, J.C.; Koehler, P.J.; Franke, C.L. [Subacute combined degeneration of the spinal cord: easy
- 58 diagnosis, effective treatment]. *Nederlands tijdschrift voor geneeskunde* **2001**, *145*, 1229–1233.
- 59 16. Nestor, P.J.; Stark, R.J. Vitamin B12 myeloneuropathy precipitated by nitrous oxide anaesthesia. *The*
- 60 *Medical journal of Australia* **1996**, *165*, 174.
- 61 17. Takacs, J. [N<sub>2</sub>O-induced acute funicular myelosis in latent vitamin B 12 deficiency]. *Anesthesiologie,*
- 62 *Intensivmedizin, Notfallmedizin, Schmerztherapie : AINS* **1996**, *31*, 525–528.
- 63 18. Lai, N.Y.; Silbert, P.L.; Erber, W.N.; Rijks, C.J. "Nanging": another cause of nitrous oxide neurotoxicity.
- 64 *The Medical journal of Australia* **1997**, *166*, 166.
- 65 19. Mayall, M. Vitamin B12 deficiency and nitrous oxide. *Lancet (London, England)* **1999**, *353*, 1529,
- 66 doi:10.1016/s0140-6736(05)75143-6.
- 67 20. Alarcia, R.; Ara, J.R.; Serrano, M.; Garcia, M.; Latorre, A.M.; Capablo, J.L. [Severe polyneuropathy after
- 68 using nitrous oxide as an anesthetic. A preventable disease?]. *Revista de neurologia* **1999**, *29*, 36–38.
- 69 21. Gothe, C.J.; Petersson, G. [Nitrous oxide and cobalamin deficiency]. *Lakartidningen* **1999**, *96*, 5609.
- 70 22. Lindstedt, G. [Nitrous oxide can cause cobalamin deficiency. Vitamin B12 is a simple and cheap
- 71 remedy]. *Lakartidningen* **1999**, *96*, 4801–4805.

- 72 23. Barbosa, L.; Leal, I.; Timoteo, A.T.; Matias, T. [Acute megaloblastic anemia caused by inhalation of  
73 nitrous oxide in a patient with multiple autoimmune pathology]. *Acta medica portuguesa* **2000**, *13*, 309–  
74 312.
- 75 24. Vinciguerra, C.; Chazerain, P.; Olivero de Rubiana, J.P.; Moulonguet, A.; Ziza, J.M. [Postoperative  
76 combined medullary sclerosis revealing Biermer's disease: toxic effect of nitrous oxide]. *Revue*  
77 *neurologique* **2000**, *156*, 665–667.
- 78 25. Smith, I. Nitrous oxide and vitamin B12. *Archives of disease in childhood* **2001**, *85*, 510.
- 79 26. Deleu, D.; Hanssens, Y.; Louon, A. Nitrous oxide-induced cobalamin deficiency. *Archives of neurology*  
80 **2001**, *58*, 134–135.
- 81 27. England, J.M.; Linnell, J.C. Problems with the serum vitamin B12 assay. *Lancet (London, England)* **1980**,  
82 *2*, 1072–1074.
- 83 28. van Geffen, G.J.; de Boer, H.D.; Liem, T. [Subacute combined degeneration of the spinal cord due to  
84 vitamin B12 deficiency: easy diagnosis, effective therapy]. *Nederlands tijdschrift voor geneeskunde* **2001**,  
85 *145*, 2195.
- 86 29. Burman, J.F. Nitrous oxide and 5,10-methylenetetrahydrofolate reductase. *The New England journal of*  
87 *medicine* **2003**, *349*, 1479–1480; author reply 1479-1480, doi:10.1056/nejm200310093491516.
- 88 30. Erbe, R.W.; Salis, R.J. Severe methylenetetrahydrofolate reductase deficiency, methionine synthase, and  
89 nitrous oxide—a cautionary tale. *The New England journal of medicine* **2003**, *349*, 5–6,  
90 doi:10.1056/NEJMp030093.
- 91 31. Yamada, T.; Hamada, H.; Mochizuki, S.; Sutoh, M.; Tsuji, M.; Kawamoto, M.; Yuge, O. General  
92 anesthesia for patient with type III homocystinuria (tetrahydrofolate reductase deficiency). *Journal of*  
93 *clinical anesthesia* **2005**, *17*, 565–567, doi:10.1016/j.jclinane.2005.01.005.
- 94 32. Gerges, F.J.; Dalal, A.R.; Robelen, G.T.; Cooper, B.; Bayer, L.A. Anesthesia for cesarean section in a  
95 patient with placenta previa and methylenetetrahydrofolate reductase deficiency. *Journal of clinical*  
96 *anesthesia* **2006**, *18*, 455–459, doi:10.1016/j.jclinane.2006.01.006.
- 97 33. Cohen Aubart, F.; Sedel, F.; Vicart, S.; Lyon-Caen, O.; Fontaine, B. [Nitric-oxide triggered neurological  
98 disorders in subjects with vitamin B12 deficiency]. *Revue neurologique* **2007**, *163*, 362–364.
- 99 34. El Otmani, H.; El Moutawakil, B.; Moutaouakil, F.; Gam, I.; Rafai, M.A.; Slassi, I. [Postoperative  
100 dementia: toxicity of nitrous oxide]. *L'Encephale* **2007**, *33*, 95–97.
- 101 35. Luzardo, G.E.; Karlinski, R.A.; Williams, B.; Mangar, D.; Camporesi, E.M. Anesthetic management of  
102 a parturient with hyperhomocysteinemia. *Anesthesia and analgesia* **2008**, *106*, 1833–1836,  
103 doi:10.1213/ane.0b013e3181732655.
- 104 36. El Otmani, H.; Moutaouakil, F.; Midafi, N.; Moudden, M.; Gam, I.; Hakim, K.; Fadel, H.; Rafai, M.A.; El  
105 Moutawakkil, B.; Slassi, I. [Cobalamin deficiency: neurological aspects in 27 cases]. *Revue neurologique*  
106 **2009**, *165*, 263–267, doi:10.1016/j.neurol.2008.10.013.
- 107 37. Paul, I.; Reichard, R.R. Subacute combined degeneration mimicking traumatic spinal cord injury. *The*  
108 *American journal of forensic medicine and pathology* **2009**, *30*, 47–48, doi:10.1097/PAF.0b013e318187373b.
- 109 38. Asghar, A.; Ali, F.M. Anaesthetic management of a young patient with homocystinuria. *Journal of the*  
110 *College of Physicians and Surgeons—Pakistan : JCPSP* **2012**, *22*, 720–722, doi:11.2012/jcpsp.720722.
- 111 39. Chaugny, C.; Simon, J.; Collin-Masson, H.; De Beauchene, M.; Cabral, D.; Fagniez, O.; Veyssier-Belot,  
112 C. [Vitamin B12 deficiency due to nitrous oxide use: unrecognized cause of combined spinal cord  
113 degeneration]. *La Revue de medecine interne* **2014**, *35*, 328–332, doi:10.1016/j.revmed.2013.04.018.

- 114 40. Chin, J.; Forzani, B.; Chowdhury, N.; Lombardo, S.; Rizzo, J.R.; Ragucci, M. Rehabilitation essential in  
115 the recovery of multifactorial subacute combined degeneration. *Annals of physical and rehabilitation*  
116 *medicine* **2015**, *58*, 190–192, doi:10.1016/j.rehab.2014.12.005.
- 117 41. Liakoni, E.; Liechti, M.E. [Not Available]. *Swiss dental journal* **2015**, *125*, 1099–1104.
- 118 42. Goodman, B.P. Metabolic and toxic causes of myelopathy. *Continuum (Minneapolis, Minn.)* **2015**, *21*, 84–  
119 –99, doi:10.1212/01.CON.0000461086.79241.3b.
- 120 43. van Amsterdam, J.; Nabben, T.; van den Brink, W. Recreational nitrous oxide use: Prevalence and risks.  
121 *Regulatory toxicology and pharmacology : RTP* **2015**, *73*, 790–796, doi:10.1016/j.yrtph.2015.10.017.
- 122 44. Garakani, A.; Jaffe, R.J.; Savla, D.; Welch, A.K.; Protin, C.A.; Bryson, E.O.; McDowell, D.M. Neurologic,  
123 psychiatric, and other medical manifestations of nitrous oxide abuse: A systematic review of the case  
124 literature. *The American journal on addictions* **2016**, *25*, 358–369, doi:10.1111/ajad.12372.
- 125 45. Ingelmo, P.; Wei, A.; Rivera, G. Nitrous oxide for procedural analgesia at home in a child with  
126 epidermolysis bullosa. *Paediatric anaesthesia* **2017**, *27*, 776–778, doi:10.1111/pan.13150.
- 127 46. Fluegge, K. Propionic acid metabolism, ASD, and vitamin B12: Is there a role for environmental nitrous  
128 oxide? *International journal of developmental neuroscience : the official journal of the International Society for*  
129 *Developmental Neuroscience* **2017**, *57*, 21–23, doi:10.1016/j.ijdevneu.2016.12.007.
- 130 47. Stockton, L.; Simonsen, C.; Seago, S. Nitrous oxide-induced vitamin B12 deficiency. *Proceedings (Baylor*  
131 *University. Medical Center)* **2017**, *30*, 171–172.
- 132 48. Layzer, R.B. Myeloneuropathy after prolonged exposure to nitrous oxide. *Lancet (London, England)* **1978**,  
133 *2*, 1227–1230.
- 134 49. Layzer, R.B.; Fishman, R.A.; Schafer, J.A. Neuropathy following abuse of nitrous oxide. *Neurology* **1978**,  
135 *28*, 504–506.
- 136 50. Sahenk, Z.; Mendell, J.R.; Couri, D.; Nachtman, J. Polyneuropathy from inhalation of N2O cartridges  
137 through a whipped-cream dispenser. *Neurology* **1978**, *28*, 485–487.
- 138 51. Gutmann, L.; Farrell, B.; Crosby, T.W.; Johnsen, D. Nitrous oxide-induced myelopathy-neuropathy:  
139 potential for chronic misuse by dentists. *J Am Dent Assoc* **1979**, *98*, 58–59.
- 140 52. Paulson, G.W. "Recreational" misuse of nitrous oxide. *J Am Dent Assoc* **1979**, *98*, 410–411.
- 141 53. Nunn, J.F.; Sharer, N.M.; Gorchein, A.; Jones, J.A.; Wickramasinghe, S.N. Megaloblastic haemopoiesis  
142 after multiple short-term exposure to nitrous oxide. *Lancet (London, England)* **1982**, *1*, 1379–1381.
- 143 54. Blanco, G.; Peters, H.A. Myeloneuropathy and macrocytosis associated with nitrous oxide abuse.  
144 *Archives of neurology* **1983**, *40*, 416–418.
- 145 55. Murdoch, B.D.; Fleming, J.H. Pattern-reversal visual evoked potential in a case of nitrous oxide abuse  
146 and recovery. *Clin Electroencephalogr* **1985**, *16*, 143–148.
- 147 56. Heyer, E.J.; Simpson, D.M.; Bodis-Wollner, I.; Diamond, S.P. Nitrous oxide: clinical and  
148 electrophysiologic investigation of neurologic complications. *Neurology* **1986**, *36*, 1618–1622.
- 149 57. Schilling, R.F. Is nitrous oxide a dangerous anesthetic for vitamin B12-deficient subjects? *Jama* **1986**, *255*,  
150 1605–1606.
- 151 58. Berger, J.J.; Modell, J.H.; Sypert, G.W. Megaloblastic anemia and brief exposure to nitrous oxide—a  
152 causal relationship. *Anesthesia and analgesia* **1988**, *67*, 197–198.
- 153 59. Stabler, S.P.; Allen, R.H.; Barrett, R.E.; Savage, D.G.; Lindenbaum, J. Cerebrospinal fluid methylmalonic  
154 acid levels in normal subjects and patients with cobalamin deficiency. *Neurology* **1991**, *41*, 1627–1632.
- 155 60. Vishnubhakat, S.M.; Beresford, H.R. Reversible myeloneuropathy of nitrous oxide abuse: serial  
156 electrophysiological studies. *Muscle & nerve* **1991**, *14*, 22–26, doi:10.1002/mus.880140105.

- 157 61. Stacy, C.B.; Di Rocco, A.; Gould, R.J. Methionine in the treatment of nitrous-oxide-induced neuropathy  
|158 and myeloneuropathy. *Journal of neurology* **1992**, *239*, 401–403.
- 159 62. Hadzic, A.; Glab, K.; Sanborn, K.V.; Thys, D.M. Severe neurologic deficit after nitrous oxide anesthesia.  
|160 *Anesthesiology* **1995**, *83*, 863–866.
- 161 63. Kinsella, L.J.; Green, R. 'Anesthesia paresthetica': nitrous oxide-induced cobalamin deficiency.  
|162 *Neurology* **1995**, *45*, 1608–1610.
- 163 64. McMorrow, A.M.; Adams, R.J.; Rubenstein, M.N. Combined system disease after nitrous oxide  
|164 anesthesia: a case report. *Neurology* **1995**, *45*, 1224–1225.
- 165 65. Rosener, M.; Dichgans, J. Severe combined degeneration of the spinal cord after nitrous oxide  
166 anaesthesia in a vegetarian. *Journal of neurology, neurosurgery, and psychiatry* **1996**, *60*, 354.
- 167 66. Brett, A. Myeloneuropathy from whipped cream bulbs presenting as conversion disorder. *Aust N Z J*  
|168 *Psychiatry* **1997**, *31*, 131–132, doi:10.3109/00048679709073810.
- 169 67. Beltramello, A.; Puppini, G.; Cerini, R.; El-Dalati, G.; Manfredi, M.; Roncolato, G.; Idone, D.; De Togni,  
170 L.; Turazzini, M. Subacute combined degeneration of the spinal cord after nitrous oxide anaesthesia:  
|171 role of magnetic resonance imaging. *Journal of neurology, neurosurgery, and psychiatry* **1998**, *64*, 563–564.
- 172 68. Pema, P.J.; Horak, H.A.; Wyatt, R.H. Myelopathy caused by nitrous oxide toxicity. *AJNR. American*  
|173 *journal of neuroradiology* **1998**, *19*, 894–896.
- 174 69. Jameson, M.; Roberts, S.; Anderson, N.E.; Thompson, P. Nitrous oxide-induced vitamin B(12)  
175 deficiency. *Journal of clinical neuroscience : official journal of the Neurosurgical Society of Australasia* **1999**, *6*,  
|176 164–166.
- 177 70. Lee, P.; Smith, I.; Piesowicz, A.; Brenton, D. Spastic paraparesis after anaesthesia. *Lancet (London,*  
178 *England)* **1999**, *353*, 554, doi:10.1016/s0140-6736(98)10090-9.
- 179 71. Ogundipe, O.; Pearson, M.W.; Slater, N.G.; Adepegba, T.; Westerdale, N. Sick cell disease and nitrous  
|180 oxide-induced neuropathy. *Clinical and laboratory haematology* **1999**, *21*, 409–412.
- 181 72. Sesso, R.M.; Iunes, Y.; Melo, A.C. Myeloneuropathy following nitrous oxide anaesthesia in a patient  
|182 with macrocytic anaemia. *Neuroradiology* **1999**, *41*, 588–590.
- 183 73. Butzkueven, H.; King, J.O. Nitrous oxide myelopathy in an abuser of whipped cream bulbs. *Journal of*  
|184 *clinical neuroscience : official journal of the Neurosurgical Society of Australasia* **2000**, *7*, 73–75,  
185 doi:10.1054/jocn.1998.0149.
- 186 74. Felmet, K.; Robins, B.; Tilford, D.; Hayflick, S.J. Acute neurologic decompensation in an infant with  
|187 cobalamin deficiency exposed to nitrous oxide. *The Journal of pediatrics* **2000**, *137*, 427–428,  
188 doi:10.1067/mpd.2000.107387.
- 189 75. Marie, R.M.; Le Biez, E.; Busson, P.; Schaeffer, S.; Boiteau, L.; Dupuy, B.; Viader, F. Nitrous oxide  
|190 anesthesia-associated myelopathy. *Archives of neurology* **2000**, *57*, 380–382.
- 191 76. McNeely, J.K.; Buczulinski, B.; Rosner, D.R. Severe neurological impairment in an infant after nitrous  
|192 oxide anesthesia. *Anesthesiology* **2000**, *93*, 1549–1550.
- 193 77. Iwata, K.; O'Keefe, G.B.; Karanas, A. Neurologic problems associated with chronic nitrous oxide abuse  
|194 in a non-healthcare worker. *The American journal of the medical sciences* **2001**, *322*, 173–174.
- 195 78. Ilniczky, S.; Jelencsik, I.; Kenez, J.; Szirmai, I. MR findings in subacute combined degeneration of the  
|196 spinal cord caused by nitrous oxide anaesthesia--two cases. *European journal of neurology* **2002**, *9*, 101–  
197 104.
- 198 79. Ng, J.; Frith, R. Nanging. *Lancet (London, England)* **2002**, *360*, 384, doi:10.1016/s0140-6736(02)09611-3.

- 199 80. Selzer, R.R.; Rosenblatt, D.S.; Laxova, R.; Hogan, K. Adverse effect of nitrous oxide in a child with 5,10-  
200 methylenetetrahydrofolate reductase deficiency. *The New England journal of medicine* **2003**, *349*, 45–50,  
201 doi:10.1056/NEJMoa021867.
- 202 81. Waclawik, A.J.; Luzzio, C.C.; Juhasz-Pocsine, K.; Hamilton, V. Myeloneuropathy from nitrous oxide  
203 abuse: unusually high methylmalonic acid and homocysteine levels. *WMJ : official publication of the State*  
204 *Medical Society of Wisconsin* **2003**, *102*, 43–45.
- 205 82. Diamond, A.L.; Diamond, R.; Freedman, S.M.; Thomas, F.P. "Whippets"-induced cobalamin deficiency  
206 manifesting as cervical myelopathy. *Journal of neuroimaging : official journal of the American Society of*  
207 *Neuroimaging* **2004**, *14*, 277–280, doi:10.1177/1051228404264956.
- 208 83. Doran, M.; Rassam, S.S.; Jones, L.M.; Underhill, S. Toxicity after intermittent inhalation of nitrous oxide  
209 for analgesia. *BMJ (Clinical research ed.)* **2004**, *328*, 1364–1365, doi:10.1136/bmj.328.7452.1364.
- 210 84. Miller, M.A.; Martinez, V.; McCarthy, R.; Patel, M.M. Nitrous oxide "whippit" abuse presenting as  
211 clinical B12 deficiency and ataxia. *The American journal of emergency medicine* **2004**, *22*, 124.
- 212 85. Ahn, S.C.; Brown, A.W. Cobalamin deficiency and subacute combined degeneration after nitrous oxide  
213 anesthesia: a case report. *Archives of physical medicine and rehabilitation* **2005**, *86*, 150–153.
- 214 86. Waters, M.F.; Kang, G.A.; Mazziotta, J.C.; DeGiorgio, C.M. Nitrous oxide inhalation as a cause of  
215 cervical myelopathy. *Acta Neurol Scand* **2005**, *112*, 270–272, doi:10.1111/j.1600-0404.2005.00473.x.
- 216 87. Sethi, N.K.; Mullin, P.; Torgovnick, J.; Capasso, G. Nitrous oxide "whippit" abuse presenting with  
217 cobalamin responsive psychosis. *Journal of medical toxicology : official journal of the American College of*  
218 *Medical Toxicology* **2006**, *2*, 71–74.
- 219 88. Cartner, M.; Sinnott, M.; Silburn, P. Paralysis caused by "nagging". *The Medical journal of Australia* **2007**,  
220 *187*, 366–367.
- 221 89. Levine, J.; Chengappa, K.N. Exposure to nitrous oxide may be associated with high homocysteine  
222 plasma levels and a risk for clinical depression. *Journal of clinical psychopharmacology* **2007**, *27*, 238–239,  
223 doi:10.1097/01.jcp.0000264982.02239.48.
- 224 90. Shulman, R.M.; Geraghty, T.J.; Tadros, M. A case of unusual substance abuse causing  
225 myeloneuropathy. *Spinal Cord* **2007**, *45*, 314–317, doi:10.1038/sj.sc.3101962.
- 226 91. Wu, M.S.; Hsu, Y.D.; Lin, J.C.; Chen, S.C.; Lee, J.T. Spinal myoclonus in subacute combined  
227 degeneration caused by nitrous oxide intoxication. *Acta neurologica Taiwanica* **2007**, *16*, 102–105.
- 228 92. Meyers, L.E.; Judge, B.S. Myeloneuropathy in a dentist. *Clinical toxicology (Philadelphia, Pa.)* **2008**, *46*,  
229 1095–1096, doi:10.1080/15563650802356617.
- 230 93. Singer, M.A.; Lazaridis, C.; Nations, S.P.; Wolfe, G.I. Reversible nitrous oxide-induced  
231 myeloneuropathy with pernicious anemia: case report and literature review. *Muscle & nerve* **2008**, *37*,  
232 125–129, doi:10.1002/mus.20840.
- 233 94. Huang, M.Y.; Tsai, W.; Chang, W.H. Nitrous oxide-induced polyneuropathy in a teenager. *Emergency*  
234 *medicine journal : EMJ* **2009**, *26*, 186, doi:10.1136/emj.2007.057471.
- 235 95. Renard, D.; Dutray, A.; Remy, A.; Castelnovo, G.; Labauge, P. Subacute combined degeneration of the  
236 spinal cord caused by nitrous oxide anaesthesia. *Neurological sciences : official journal of the Italian*  
237 *Neurological Society and of the Italian Society of Clinical Neurophysiology* **2009**, *30*, 75–76,  
238 doi:10.1007/s10072-009-0013-2.
- 239 96. Wijesekera, N.T.; Davagnanam, I.; Miszkziel, K. Subacute combined cord degeneration: a rare  
240 complication of nitrous oxide misuse. A case report. *The neuroradiology journal* **2009**, *22*, 194–197,  
241 doi:10.1177/197140090902200210.



- 242 97. Richardson, P.G. Peripheral neuropathy following nitrous oxide abuse. *Emerg Med Australas* **2010**, *22*,  
243 88–90, doi:10.1111/j.1742-6723.2009.01262.x.
- 244 98. Tatum, W.O.; Bui, D.D.; Grant, E.G.; Murtagh, R. Pseudo-guillain-barre syndrome due to "whippet"-  
245 induced myeloneuropathy. *Journal of neuroimaging : official journal of the American Society of Neuroimaging*  
246 **2010**, *20*, 400–401, doi:10.1111/j.1552-6569.2009.00388.x.
- 247 99. Alt, R.S.; Morrissey, R.P.; Gang, M.A.; Hoffman, R.S.; Schaumburg, H.H. Severe myeloneuropathy from  
248 acute high-dose nitrous oxide (N<sub>2</sub>O) abuse. *The Journal of emergency medicine* **2011**, *41*, 378–380,  
249 doi:10.1016/j.jemermed.2010.04.020.
- 250 100. Hathout, L.; El-Saden, S. Nitrous oxide-induced B(1)(2) deficiency myelopathy: Perspectives on the  
251 clinical biochemistry of vitamin B(1)(2). *Journal of the neurological sciences* **2011**, *301*, 1–8,  
252 doi:10.1016/j.jns.2010.10.033.
- 253 101. Lin, R.J.; Chen, H.F.; Chang, Y.C.; Su, J.J. Subacute combined degeneration caused by nitrous oxide  
254 intoxication: case reports. *Acta neurologica Taiwanica* **2011**, *20*, 129–137.
- 255 102. Probasco, J.C.; Felling, R.J.; Carson, J.T.; Dorsey, E.R.; Niessen, T.M. Teaching NeuroImages:  
256 myelopathy due to B(1)(2) deficiency in long-term colchicine treatment and nitrous oxide misuse.  
257 *Neurology* **2011**, *77*, e51, doi:10.1212/WNL.0b013e31822c910f.
- 258 103. Ghobrial, G.M.; Dalyai, R.; Flanders, A.E.; Harrop, J. Nitrous oxide myelopathy posing as spinal cord  
259 injury. *Journal of neurosurgery. Spine* **2012**, *16*, 489–491, doi:10.3171/2012.2.spine11532.
- 260 104. Hsu, C.K.; Chen, Y.Q.; Lung, V.Z.; His, S.C.; Lo, H.C.; Shyu, H.Y. Myelopathy and polyneuropathy  
261 caused by nitrous oxide toxicity: a case report. *The American journal of emergency medicine* **2012**, *30*,  
262 1016.e1013-1016, doi:10.1016/j.ajem.2011.05.001.
- 263 105. Sotirchos, E.S.; Saidha, S.; Becker, D. Neurological picture. Nitrous oxide-induced myelopathy with  
264 inverted V-sign on spinal MRI. *Journal of neurology, neurosurgery, and psychiatry* **2012**, *83*, 915–916,  
265 doi:10.1136/jnnp-2012-303105.
- 266 106. Cheng, H.M.; Park, J.H.; Hernstadt, D. Subacute combined degeneration of the spinal cord following  
267 recreational nitrous oxide use. *BMJ case reports* **2013**, *2013*, doi:10.1136/bcr-2012-008509.
- 268 107. Chiang, T.T.; Hung, C.T.; Wang, W.M.; Lee, J.T.; Yang, F.C. Recreational nitrous oxide abuse-induced  
269 vitamin B12 deficiency in a patient presenting with hyperpigmentation of the skin. *Case reports in*  
270 *dermatology* **2013**, *5*, 186–191, doi:10.1159/000353623.
- 271 108. Gursoy, A.E.; Kolukisa, M.; Babacan-Yildiz, G.; Celebi, A. Subacute Combined Degeneration of the  
272 Spinal Cord due to Different Etiologies and Improvement of MRI Findings. *Case reports in neurological*  
273 *medicine* **2013**, *2013*, 159649, doi:10.1155/2013/159649.
- 274 109. Safari, A.; Emadi, F.; Jamali, E.; Borhani-Haghighi, A. Clinical and MRI manifestations of nitrous oxide  
275 induced vitamin B12 deficiency: A case report. *Iranian journal of neurology* **2013**, *12*, 111–113.
- 276 110. Arshi, B.; Shaw, S. Subacute ascending numbness. *Clinical toxicology (Philadelphia, Pa.)* **2014**, *52*, 905–  
277 906, doi:10.3109/15563650.2014.953170.
- 278 111. Dababneh, H.; Hussain, M.; Guerrero, W.R.; Xu, J.; Morgan, W.; Mocco, J.; Kirmani, J.F. "Whippets"-  
279 induced vitamin B12 deficiency and dorsal column degeneration. *Journal of vascular and interventional*  
280 *neurology* **2014**, *7*, 8.
- 281 112. Garakani, A.; Welch, A.K.; Jaffe, R.J.; Protin, C.A.; McDowell, D.M. Psychosis and low cyanocobalamin  
282 in a patient abusing nitrous oxide and cannabis. *Psychosomatics* **2014**, *55*, 715–719,  
283 doi:10.1016/j.psym.2013.11.001.

- 284 113. Hu, M.H.; Huang, G.S.; Wu, C.T.; Hung, P.C. Nitrous oxide myelopathy in a pediatric patient. *Pediatric*  
285 *emergency care* **2014**, *30*, 266–267, doi:10.1097/pec.000000000000110.
- 286 114. Rheinboldt, M.; Harper, D.; Parrish, D.; Francis, K.; Blase, J. Nitrous oxide induced myeloneuropathy:  
287 a case report. *Emergency radiology* **2014**, *21*, 85–88, doi:10.1007/s10140-013-1152-6.
- 288 115. Shwe, Y.; Scelsa, S.N. A 23-year-old man with acute onset paresthesias and gait ataxia. *Journal of clinical*  
289 *neuromuscular disease* **2014**, *15*, 192–193, doi:10.1097/cnd.0000000000000035.
- 290 116. Duque, M.A.; Kresak, J.L.; Falchook, A.; Harris, N.S. Nitrous Oxide Abuse and Vitamin B12 Action in a  
291 20-Year-Old Woman: A Case Report. *Laboratory medicine* **2015**, *46*, 312–315,  
292 doi:10.1309/Im019havxchf1uqm.
- 293 117. Morris, N.; Lynch, K.; Greenberg, S.A. Severe motor neuropathy or neuronopathy due to nitrous oxide  
294 toxicity after correction of vitamin B12 deficiency. *Muscle & nerve* **2015**, *51*, 614–616,  
295 doi:10.1002/mus.24482.
- 296 118. Pugliese, R.S.; Slagle, E.J.; Oettinger, G.R.; Neuburger, K.J.; Ambrose, T.M. Subacute combined  
297 degeneration of the spinal cord in a patient abusing nitrous oxide and self-medicating with  
298 cyanocobalamin. *American journal of health-system pharmacy : AJHP : official journal of the American Society*  
299 *of Health-System Pharmacists* **2015**, *72*, 952–957, doi:10.2146/ajhp140583.
- 300 119. Thompson, A.G.; Leite, M.I.; Lunn, M.P.; Bennett, D.L. Whippits, nitrous oxide and the dangers of legal  
301 highs. *Practical neurology* **2015**, *15*, 207–209, doi:10.1136/practneurol-2014-001071.
- 302 120. Wolpert, F.; Barath, K.; Brakowski, J.; Renzel, R.; Linnebank, M.; Gantenbein, A.R. Funicular myelosis  
303 in a butcher: it was the cream cans. *Case reports in neurological medicine* **2015**, *2015*, 827168,  
304 doi:10.1155/2015/827168.
- 305 121. Chen, H.J.; Huang, C.S. Nitrous Oxide-induced Subacute Combined Degeneration Presenting with  
306 Dystonia and Pseudoathetosis: A Case Report. *Acta neurologica Taiwanica* **2016**, *25*, 50–55.
- 307 122. Hirvioja, J.; Joutsa, J.; Wahlsten, P.; Korpela, J. Recurrent paraparesis and death of a patient with  
308 'whippet' abuse. *Oxford medical case reports* **2016**, *2016*, 41–43, doi:10.1093/omcr/omw012.
- 309 123. Massey, T.H.; Pickersgill, T.T.; K, J.P. Nitrous oxide misuse and vitamin B12 deficiency. *BMJ case reports*  
310 **2016**, *2016*, doi:10.1136/bcr-2016-215728.
- 311 124. Sleeman, I.; Wiblin, L.; Burn, D. An unusual cause of falls in a young woman. *The journal of the Royal*  
312 *College of Physicians of Edinburgh* **2016**, *46*, 160–162, doi:10.4997/jrcpe.2016.304.
- 313 125. Buizert, A.; Sharma, R.; Koppen, H. When the Laughing Stops: Subacute Combined Spinal Cord  
314 Degeneration Caused by Laughing Gas Use. *Journal of addiction medicine* **2017**, *11*, 235–236,  
315 doi:10.1097/adm.0000000000000295.
- 316 126. Kaski, D.; Kumar, P.; Murphy, E.; Warner, T.T. Iatrogenic B12-deficient peripheral neuropathy  
317 following nitrous oxide administration for functional tonic leg spasm: A case report. *Clinical neurology*  
318 *and neurosurgery* **2017**, *160*, 108–110, doi:10.1016/j.clineuro.2017.07.006.
- 319 127. Yuan, J.L.; Wang, S.K.; Jiang, T.; Hu, W.L. Nitrous oxide induced subacute combined degeneration with  
320 longitudinally extensive myelopathy with inverted V-sign on spinal MRI: a case report and literature  
321 review. *BMC Neurol* **2017**, *17*, 222, doi:10.1186/s12883-017-0990-3.
- 322 128. Chen, T.; Zhong, N.; Jiang, H.; Zhao, M.; Chen, Z.; Sun, H. Neuropsychiatric Symptoms Induced by  
323 Large Doses of Nitrous Oxide Inhalation: A Case Report. *Shanghai Arch Psychiatry* **2018**, *30*, 56–59,  
324 doi:10.11919/j.issn.1002-0829.217084.

- 325 129. Egan, W.; Steinberg, E.; Rose, J. Vitamin B12 deficiency-induced neuropathy secondary to prolonged  
326 recreational use of nitrous oxide. *The American journal of emergency medicine* **2018**,  
327 10.1016/j.ajem.2018.05.029, doi:10.1016/j.ajem.2018.05.029.
- 328 130. Johnson, K.; Mikhail, P.; Kim, M.G.; Bosco, A.; Huynh, W. Recreational nitrous oxide-associated  
329 neurotoxicity. *Journal of neurology, neurosurgery, and psychiatry* **2018**, *89*, 897–898, doi:10.1136/jnnp-2017-  
330 317768.
- 331 131. Keddie, S.; Adams, A.; Kelso, A.R.C.; Turner, B.; Schmierer, K.; Gnanapavan, S.; Malaspina, A.;  
332 Giovannoni, G.; Basnett, I.; Noyce, A.J. No laughing matter: subacute degeneration of the spinal cord  
333 due to nitrous oxide inhalation. *Journal of neurology* **2018**, *265*, 1089–1095, doi:10.1007/s00415-018-8801-  
334 3.
- 335 132. Middleton, J.A.; Roffers, J.A. Peripheral Neuropathy Due to Recreational Use of Nitrous Oxide  
336 Presenting After an Ankle Sprain With Foot Drop. *Orthopedics* **2018**, *41*, e432-e433,  
337 doi:10.3928/01477447-20171102-05.
- 338 133. Clarke, R.; Grimley Evans, J.; Schneede, J.; Nexo, E.; Bates, C.; Fletcher, A.; Prentice, A.; Johnston, C.;  
339 Ueland, P.M.; Refsum, H., et al. Vitamin B12 and folate deficiency in later life. *Age Ageing* **2004**, *33*, 34–  
340 41.
- 341 134. McLean, E.; de Benoist, B.; Allen, L.H. Review of the magnitude of folate and vitamin B12 deficiencies  
342 worldwide. *Food Nutr Bull* **2008**, *29*, S38-51, doi:10.1177/156482650802925107.
- 343 135. Thuesen, B.H.; Husemoen, L.L.; Ovesen, L.; Jorgensen, T.; Fenger, M.; Linneberg, A. Lifestyle and  
344 genetic determinants of folate and vitamin B12 levels in a general adult population. *The British journal*  
345 *of nutrition* **2010**, *103*, 1195–1204, doi:10.1017/S0007114509992947.
- 346 136. MacFarlane, A.J.; Greene-Finestone, L.S.; Shi, Y. Vitamin B-12 and homocysteine status in a folate-  
347 replete population: results from the Canadian Health Measures Survey. *The American journal of clinical*  
348 *nutrition* **2011**, *94*, 1079–1087, doi:10.3945/ajcn.111.020230.
- 349 137. Benson, J.; Phillips, C.; Kay, M.; Webber, M.T.; Ratcliff, A.J.; Correa-Velez, I.; Lorimer, M.F. Low vitamin  
350 B12 levels among newly-arrived refugees from Bhutan, Iran and Afghanistan: a multicentre Australian  
351 study. *PLoS One* **2013**, *8*, e57998, doi:10.1371/journal.pone.0057998.
- 352 138. El-Khateeb, M.; Khader, Y.; Batiha, A.; Jaddou, H.; Hyassat, D.; Belbisi, A.; Ajlouni, K. Vitamin B12  
353 deficiency in Jordan: a population-based study. *Ann Nutr Metab* **2014**, *64*, 101–105,  
354 doi:10.1159/000355440.
- 355 139. Brito, A.; Mujica-Coopman, M.F.; Lopez de Romana, D.; Cori, H.; Allen, L.H. Folate and Vitamin B12  
356 Status in Latin America and the Caribbean: An Update. *Food Nutr Bull* **2015**, *36*, S109-118,  
357 doi:10.1177/0379572115585772.
- 358 140. Karabulut, A.; Guler, O.T.; Karahan, H.T.; Ozkan, S.; Koyuncu, H.; Demirciler, I. Premarital screening  
359 of 466 Mediterranean women for serum ferritin, vitamin B12, and folate concentrations. *Turk J Med Sci*  
360 **2015**, *45*, 358–363.
- 361 141. Quay, T.A.; Schroder, T.H.; Jeruszka-Bielak, M.; Li, W.; Devlin, A.M.; Barr, S.I.; Lamers, Y. High  
362 prevalence of suboptimal vitamin B12 status in young adult women of South Asian and European  
363 ethnicity. *Appl Physiol Nutr Metab* **2015**, *40*, 1279–1286, doi:10.1139/apnm-2015-0200.
- 364 142. Sivaprasad, M.; Shalini, T.; Balakrishna, N.; Sudarshan, M.; Lopamudra, P.; Suryanarayana, P.; Arlappa,  
365 N.; Ravikumar, B.P.; Radhika, M.S.; Reddy, G.B. Status of Vitamin B12 and Folate among the Urban  
366 Adult Population in South India. *Ann Nutr Metab* **2016**, *68*, 94–102, doi:10.1159/000442677.

367 143. Green, R.; Allen, L.H.; Bjorke-Monsen, A.L.; Brito, A.; Gueant, J.L.; Miller, J.W.; Molloy, A.M.; Nexø, E.;  
368 Stabler, S.; Toh, B.H., et al. Vitamin B12 deficiency. *Nature reviews. Disease primers* 2017, 3, 17040,  
369 doi:10.1038/nrdp.2017.40.  
370

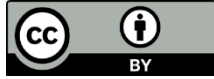

© 2019 by the authors. Submitted for possible open access publication under the terms and conditions of the Creative Commons Attribution (CC BY) license (<http://creativecommons.org/licenses/by/4.0/>).

371
